# Supplementary material for: Meanings Attributed to Physical Activity and Changes in Self-Reported and Accelerometer-Measured Physical Activity among Recent Retirees
Source: MDPI journal article supplement (doi:10.3390/ijerph192315567), 2022-11-23
Supplement: s1 [file s1]

**Supplementary Table S1.** Individual items included in the 54-item inventory assessing the importance of meanings attributed to physical activity.

| Item                                    | n   | Mean | Standard deviation | Rated as fairly or very important (%) |
|-----------------------------------------|-----|------|--------------------|---------------------------------------|
| Maintaining health                      | 230 | 4.70 | 0.57               | 96                                    |
| Nature                                  | 230 | 4.56 | 0.73               | 95                                    |
| Restoration                             | 229 | 4.44 | 0.66               | 96                                    |
| Feeling good                            | 230 | 4.40 | 0.78               | 92                                    |
| Joy                                     | 221 | 4.39 | 0.77               | 91                                    |
| Improving fitness                       | 228 | 4.29 | 0.74               | 90                                    |
| Finding balance                         | 230 | 4.25 | 0.81               | 84                                    |
| Relaxation                              | 229 | 4.19 | 0.75               | 86                                    |
| Making social contacts                  | 229 | 4.14 | 0.70               | 84                                    |
| Regularity                              | 230 | 3.93 | 0.87               | 75                                    |
| Knowing one's own body                  | 229 | 3.89 | 0.81               | 75                                    |
| Physical exertion                       | 229 | 3.86 | 0.83               | 77                                    |
| Spending time with significant others   | 230 | 3.79 | 1.05               | 70                                    |
| Proximity of physical activity location | 229 | 3.76 | 0.95               | 70                                    |
| Regular program                         | 230 | 3.73 | 0.98               | 69                                    |
| Familiar sport                          | 228 | 3.72 | 0.87               | 64                                    |
| Attaining muscle                        | 228 | 3.71 | 0.94               | 64                                    |
| Fun/play                                | 227 | 3.71 | 0.96               | 65                                    |
| Joy of success                          | 229 | 3.69 | 0.97               | 66                                    |
| Own time                                | 229 | 3.68 | 0.95               | 62                                    |
| Weight maintenance                      | 229 | 3.66 | 1.11               | 64                                    |
| Unwinding                               | 230 | 3.65 | 0.94               | 64                                    |
| Affordability of physical activity      | 228 | 3.63 | 1.02               | 61                                    |
| Versatility                             | 229 | 3.56 | 0.92               | 59                                    |
| Monitoring development                  | 229 | 3.52 | 0.92               | 58                                    |
| New experiences                         | 228 | 3.48 | 0.94               | 54                                    |
| Like-minded others                      | 227 | 3.44 | 1.09               | 58                                    |
| Mental stimulation                      | 230 | 3.35 | 0.94               | 45                                    |
| Sense of belonging                      | 229 | 3.34 | 1.01               | 45                                    |
| Psychological growth                    | 229 | 3.33 | 1.01               | 43                                    |
| Alleviating stress                      | 229 | 3.29 | 1.10               | 50                                    |
| Learning new skills                     | 226 | 3.18 | 1.00               | 39                                    |
| Instruction from others                 | 229 | 3.13 | 1.09               | 41                                    |
| Being in a group                        | 229 | 3.06 | 1.14               | 37                                    |
| Sense of competence                     | 230 | 3.05 | 1.07               | 35                                    |
| Cooperation/encouragement               | 229 | 3.05 | 1.07               | 38                                    |
| Facilities of a sport location          | 230 | 3.02 | 1.06               | 36                                    |
| Increasing confidence                   | 229 | 2.94 | 1.04               | 27                                    |
| Aiming for better performances          | 229 | 2.90 | 1.04               | 29                                    |
| Improving appearance                    | 230 | 2.78 | 1.12               | 30                                    |
| Developing self-control                 | 228 | 2.74 | 1.14               | 24                                    |
| Brisk action                            | 229 | 2.72 | 1.10               | 24                                    |
| Doing physical activity alone           | 230 | 2.52 | 1.01               | 13                                    |
| Adopting a different role               | 229 | 2.28 | 1.05               | 11                                    |
| Minimizing failure                      | 230 | 2.26 | 1.06               | 10                                    |
| Pushing the limits                      | 227 | 2.22 | 1.09               | 13                                    |
| Technical gear/equipment                | 229 | 2.13 | 1.12               | 13                                    |
| Risk/excitement                         | 228 | 1.90 | 1.00               | 6                                     |
| Trendy equipment                        | 228 | 1.68 | 0.92               | 4                                     |
| Trendy sport                            | 229 | 1.68 | 0.84               | 2                                     |
| Trendy physical activity location       | 227 | 1.63 | 0.98               | 5                                     |
| Competition                             | 229 | 1.58 | 0.86               | 2                                     |

|                        |     |      |      |   |
|------------------------|-----|------|------|---|
| Attaining trendy image | 229 | 1.57 | 0.84 | 2 |
| Success/Winning        | 228 | 1.50 | 0.79 | 1 |

**Supplementary Table S2.** The associations between physical activity meaning dimensions and accelerometer-measured moderate-to-vigorous physical activity (MVPA) over 12 months (Pearson correlation coefficients for zero-order correlations at baseline (*r*) and covariate adjusted general linear models (B, 95% CI, F, *p*) with change in R<sup>2</sup> with reference to the base model with covariates ( $\Delta R^2$ )).

| MVPA at baseline <sup>1</sup> |                                                            |                       |      |          |                 | Changes in total MVA over 12 months <sup>2</sup>           |      |          |                 |
|-------------------------------|------------------------------------------------------------|-----------------------|------|----------|-----------------|------------------------------------------------------------|------|----------|-----------------|
| Base Model with covariates    | F <sub>8,221</sub> = 2.90, p=0.0042, R <sup>2</sup> =0.095 |                       |      |          |                 | F <sub>10,213</sub> =23.68, p<.0001, R <sup>2</sup> =0.526 |      |          |                 |
|                               | <i>r</i>                                                   | B (95% CI)            | F    | <i>p</i> | ΔR <sup>2</sup> | B (95% CI)                                                 | F    | <i>p</i> | ΔR <sup>2</sup> |
| Positive Mood                 | -.01                                                       | -0.02 (-0.15 to 0.11) | 0.10 | 0.757    | 0.000           | 0.06 (-0.04 to 0.15)                                       | 1.47 | 0.226    | 0.003           |
| Physical Fitness              | 0.07                                                       | 0.06 (-0.07 to 0.19)  | 0.91 | 0.304    | 0.004           | 0.09 (0.00 to 0.19)                                        | 3.55 | 0.061    | 0.007           |
| Practical Facilitators        | 0.01                                                       | -0.02 (-0.16 to 0.11) | 0.12 | 0.731    | 0.000           | 0.04 (-0.06 to 0.14)                                       | 0.66 | 0.416    | 0.001           |
| Mental Well-Being             | 0.10                                                       | 0.11 (-0.02 to 0.25)  | 2.61 | 0.107    | 0.010           | 0.02 (-0.08 to 0.12)                                       | 0.15 | 0.703    | 0.000           |
| New Experiences               | -.02                                                       | 0.00 (-0.14 to 0.12)  | 0.01 | 0.935    | 0.000           | 0.02 (-0.07 to 0.12)                                       | 0.23 | 0.633    | 0.000           |
| Belonging                     | -.06                                                       | -0.02 (-0.15 to 0.12) | 0.08 | 0.801    | 0.000           | 0.03 (-0.07 to 0.13)                                       | 0.37 | 0.544    | 0.000           |
| Achievement                   | 0.07                                                       | 0.09 (-0.05 to 0.22)  | 1.54 | 0.216    | 0.006           | 0.01 (-0.09 to 0.11)                                       | 0.05 | 0.822    | 0.000           |
| Trends & Status               | -.03                                                       | -0.02 (-0.16 to 0.12) | 0.11 | 0.745    | 0.000           | 0.00 (-0.10 to 0.10)                                       | 0.00 | 0.995    | 0.000           |

<sup>1</sup> adjusted with age, body mass index, gender, occupational background, self-rated health, wear time. <sup>2</sup> adjusted with age, body mass index, gender, occupational background, self-rated health, intervention group, baseline level, difference in wear time t12 – t0.
